# Supplementary material
Source: bioRxiv or medRxiv preprint supplement (https://www.biorxiv.org/highwire/filestream/42873/field_highwire_adjunct_files/0/144790-1.pdf)
Supplement: Supplementary file [file 144790-1.pdf]

Figure 4: cgMLST phylogeny of all outbreak isolates between February-May 2016 in Sydney.

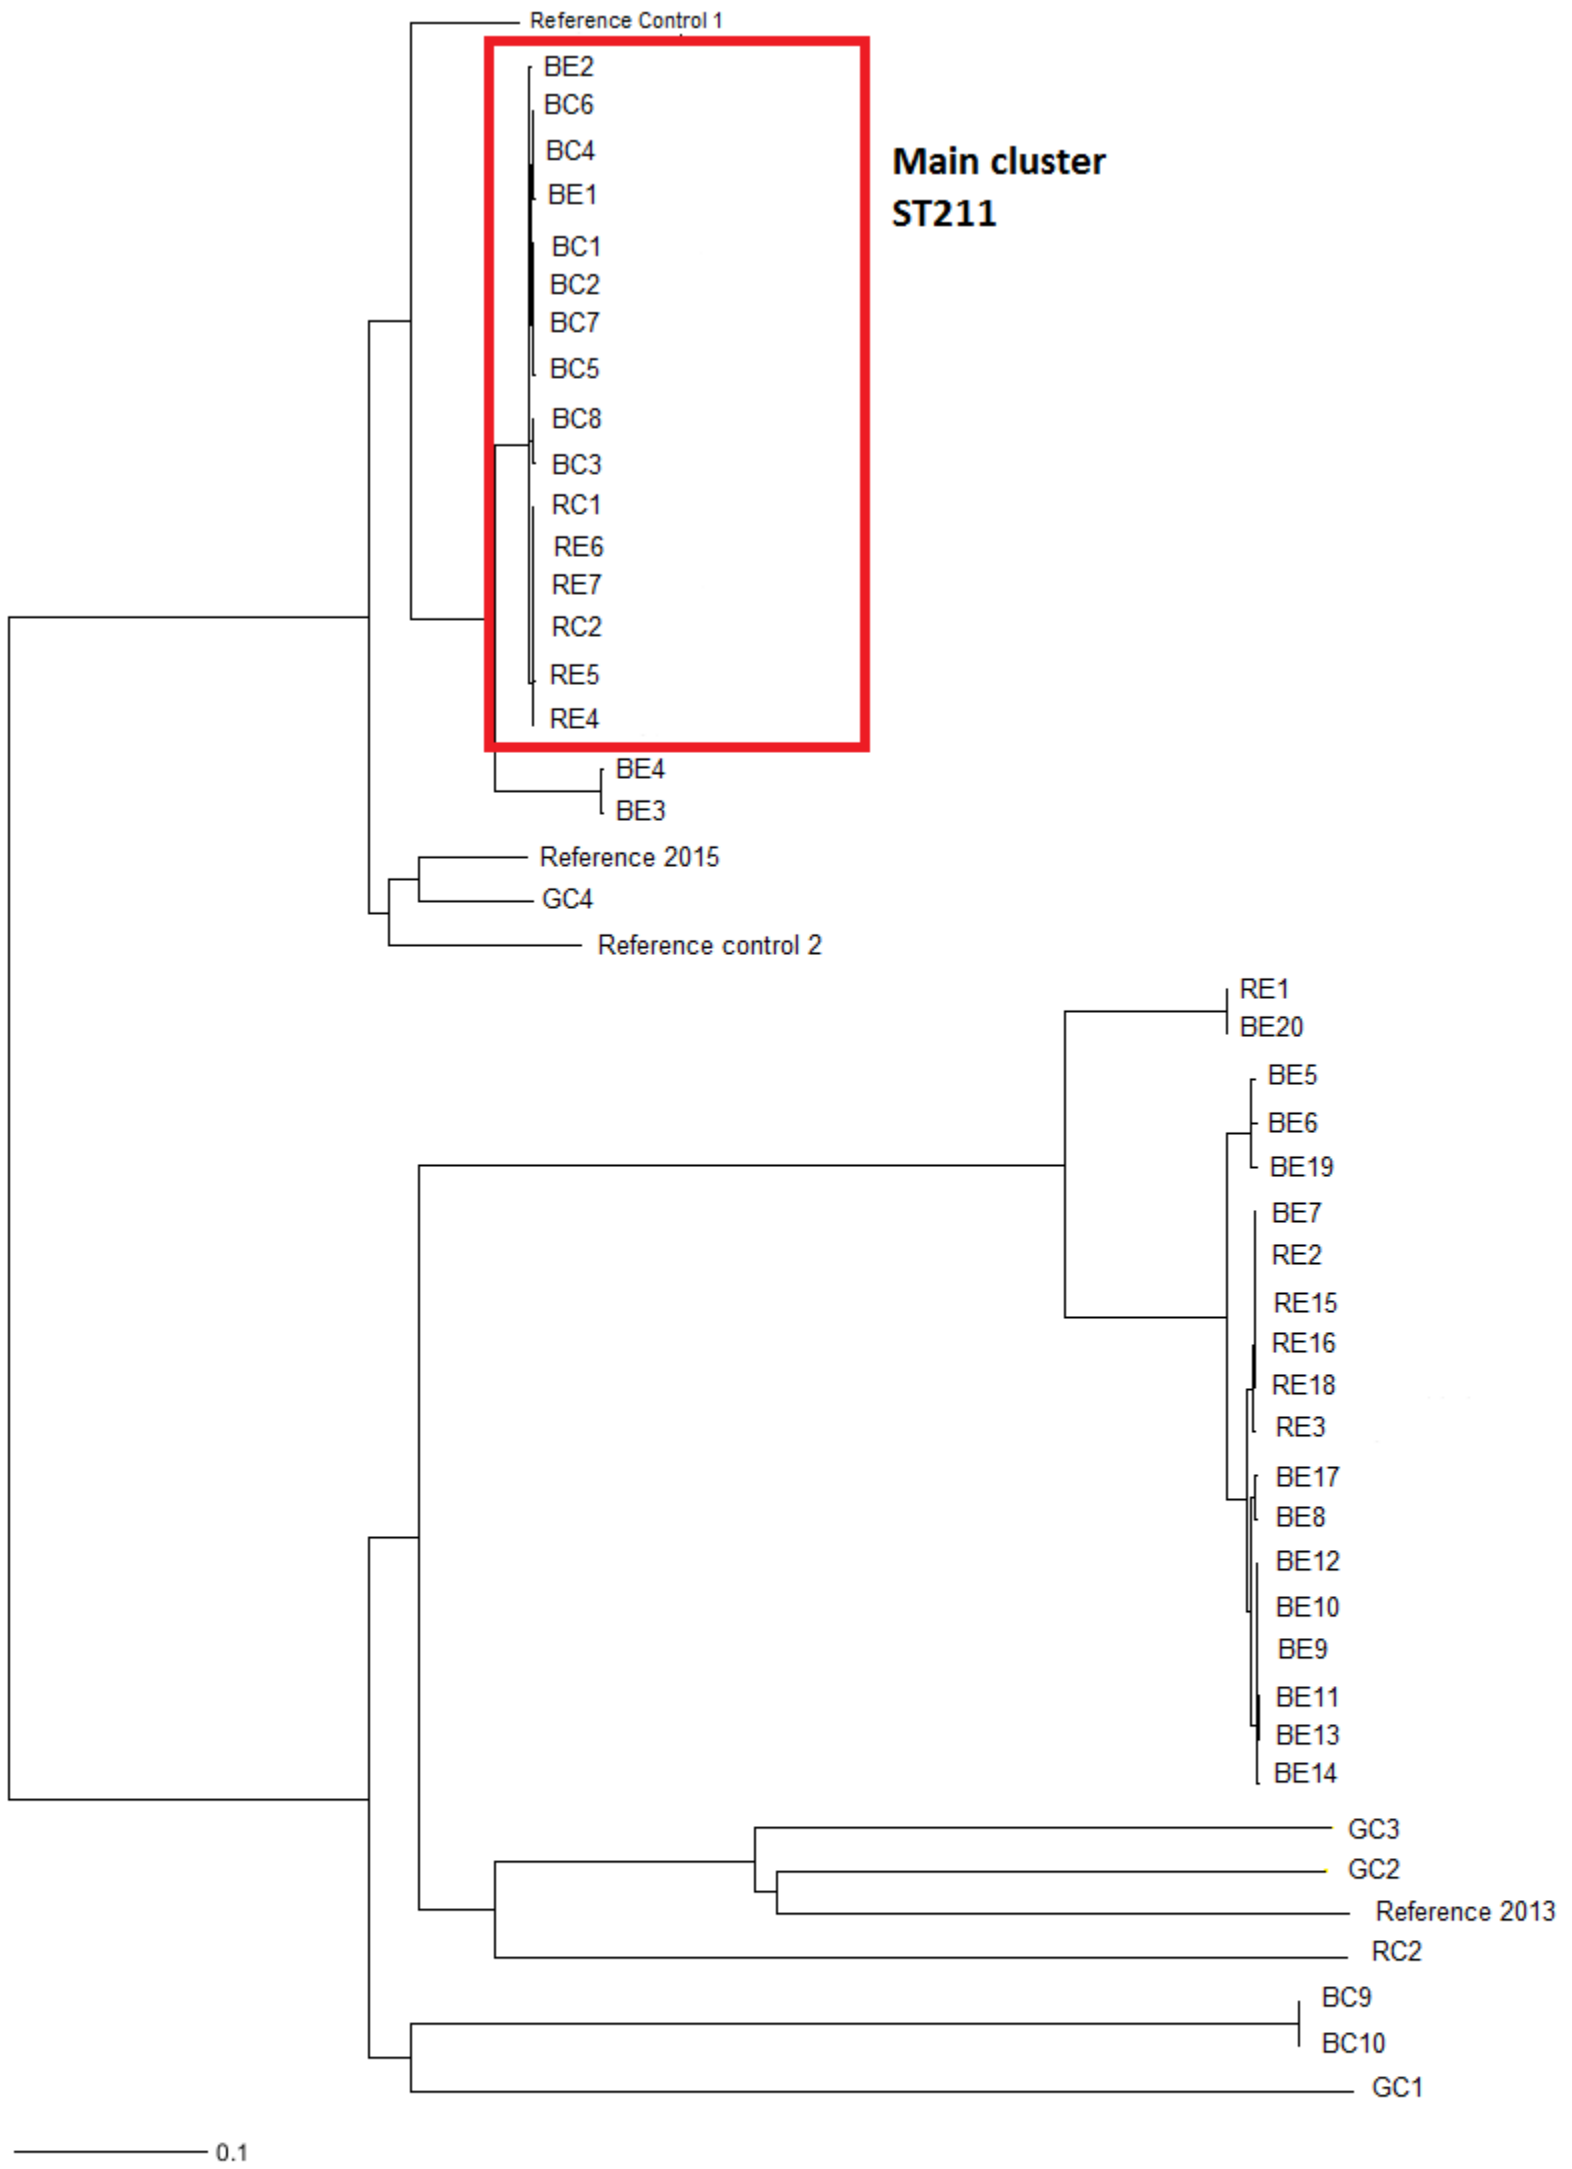

NJ tree for 48 Samples based on 1530 columns, pairwise ignoring missing values, % columns difference  
Distance based on columns from *L. pneumophila* cgMLST 1530 targets Philadelphia 1 (1530)
